# Supplementary material for: Effects of Estradiol on Immunoglobulin G Glycosylation: Mapping of the Downstream Signaling Mechanism
Source: PubMed Central journal article supplement (PMC8186398; doi:10.3389/fimmu.2021.680227), 2021-05-25
Supplement: DataSheet_1.pdf [file DataSheet_1.pdf]

## **Effects of estradiol on immunoglobulin G glycosylation: mapping of the downstream signalling mechanism**

Anika Mijakovac<sup>1,\*</sup>, Julija Jurić<sup>2,\*</sup>, Wendy M. Kohrt<sup>3,4</sup>, Jasminka Krištić<sup>2</sup>, Domagoj Kifer<sup>5</sup>, Kathleen M. Gavin<sup>3,4</sup>, Karlo Miškec<sup>1</sup>, Azra Frkatović<sup>2</sup>, Frano Vučković<sup>2</sup>, Marija Pezer<sup>2</sup>, Aleksandar Vojta<sup>1</sup>, Peter A. Nigrović<sup>6,7</sup>, Vlatka Zoldoš<sup>1,a</sup>, Gordan Lauc<sup>2,5,a</sup>

<sup>1</sup> Department of Molecular Biology, University of Zagreb Faculty of Science, Zagreb, Croatia

<sup>2</sup> Genos Glycoscience Research Laboratory, Zagreb, Croatia

<sup>3</sup> Division of Geriatric Medicine, School of Medicine, University of Colorado Anschutz Medical Campus, Aurora, Colorado, USA

<sup>4</sup> Eastern Colorado VA Geriatric Research, Education and Clinical Center, Aurora, Colorado, USA

<sup>5</sup> Faculty of Pharmacy and Biochemistry, University of Zagreb, Zagreb, Croatia

<sup>6</sup> Division of Rheumatology, Immunology and Allergy, Brigham and Women's Hospital, Boston, Massachusetts, USA

<sup>7</sup> Division of Immunology, Boston Children's Hospital, Boston, Massachusetts, USA

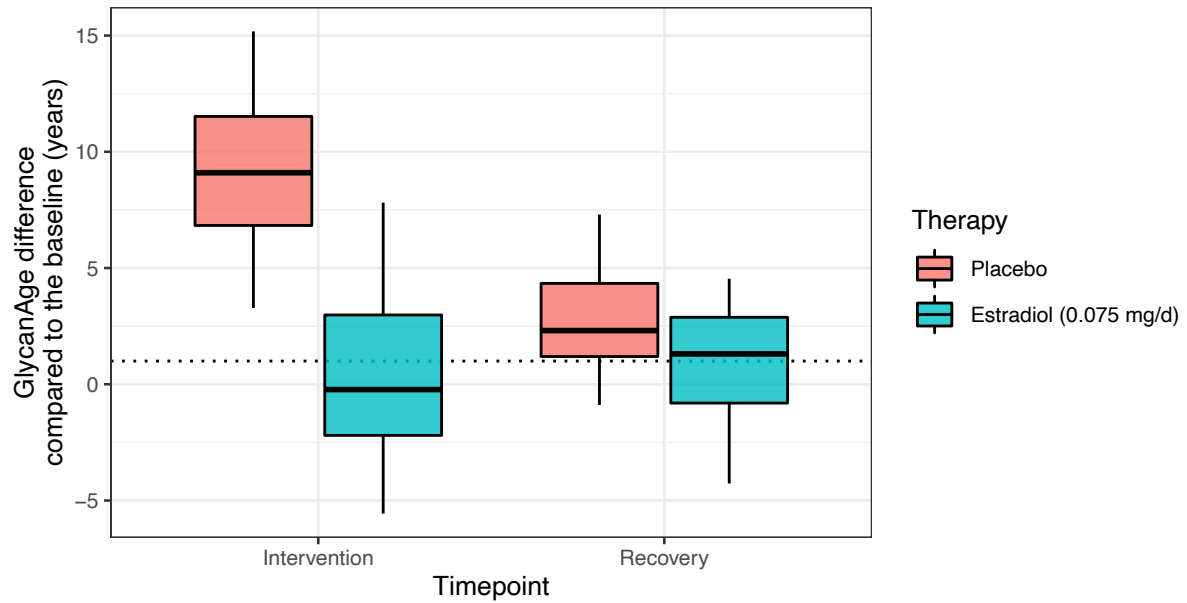

**Supplementary Figure 1. Effects of gonadal hormone suppression on GlycanAge.** Gonadotropin-releasing hormone analogue leuprolide acetate (GnRH<sub>AG</sub>) was used to lower gonadal steroids to postmenopausal levels in healthy premenopausal women (n=36) that were then randomized to transdermal placebo (n=21) or estradiol patch (n=15). Changes in the GlycanAge after five months of GnRH<sub>AG</sub> (Intervention) with supplementation of E<sub>2</sub> (transdermal estradiol supplementation) or without supplementation of E<sub>2</sub> (supplementation with placebo), and four months after the end of the intervention (Recovery) are shown on the graph.

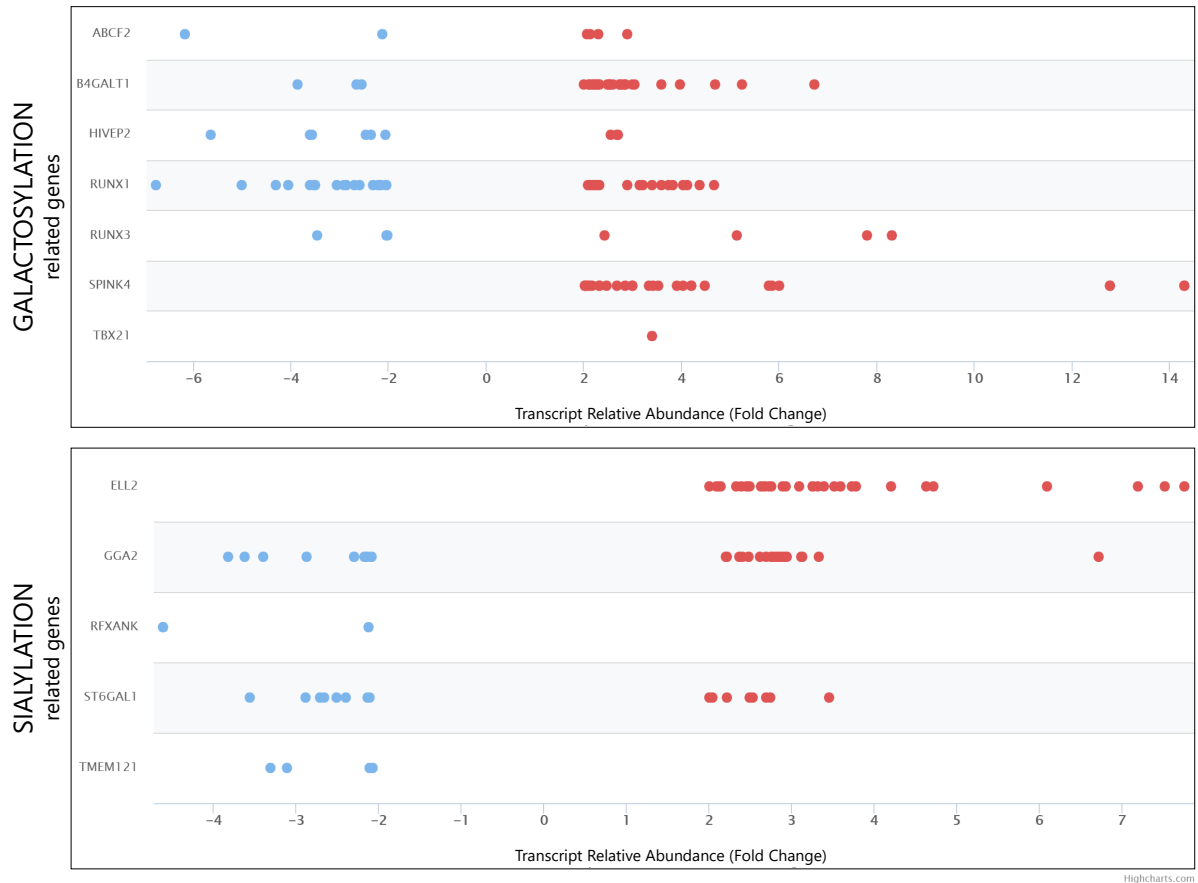

**Supplementary Figure 2.** Effects of estradiol E<sub>2</sub> on expression of genes, GWAS hits for IgG galactosylation and sialylation.

**Supplementary Table 1.** Glycan abundances (%) of derived glycan traits at the baseline and deviations from the baseline after intervention and after recovery timepoint.

| GLYCAN    | INTERVENTION | DIFFERENCE IN GLYCAN ABUNDANCE (%) |                                                                                               |                                                         |
|-----------|--------------|------------------------------------|-----------------------------------------------------------------------------------------------|---------------------------------------------------------|
|           |              | AT BASELINE                        | RELATIVE TO BASELINE.                                                                         |                                                         |
| N         |              | MEDIAN (IQR)                       | SAMPLING AFTER:                                                                               |                                                         |
|           |              |                                    | Intervention<br>median (IQR)      P <sub>I</sub> Recovery<br>median (IQR)      P <sub>R</sub> |                                                         |
| <b>B</b>  | Placebo      | 15.9<br>(14.8 - 16.8)              | 0.889<br>(0.445 - 1.026) <b>7,10×10<sup>-3</sup></b>                                          | 0.168<br>(0.036 - 0.492) <b>3,31×10<sup>-1</sup></b>    |
|           | Estradiol    | 15.9<br>(14.2 - 16.6)              | 0.281<br>(-0.155 - 0.469)                                                                     | 0.027<br>(-0.290 - 0.284)                               |
| <b>CF</b> | Placebo      | 95.4<br>(94.8 - 96.3)              | 0.118<br>(-0.095 - 0.311) <b>2,35×10<sup>-1</sup></b>                                         | 0.052<br>(-0.029 - 0.145) <b>7,70×10<sup>-1</sup></b>   |
|           | Estradiol    | 95.8<br>(95.4 - 96.4)              | -0.026<br>(-0.124 - 0.087)                                                                    | 0.027<br>(-0.134 - 0.159)                               |
| <b>HM</b> | Placebo      | 0.158<br>(0.143 - 0.180)           | 0.021<br>(0.011 - 0.028) <b>2,56×10<sup>-4</sup></b>                                          | 0.009<br>(-0.004 - 0.015) <b>3,22×10<sup>-2</sup></b>   |
|           | Estradiol    | 0.162<br>(0.155 - 0.194)           | -0.004<br>(-0.010 - 0.006)                                                                    | -0.004<br>(-0.013 - 0.005)                              |
| <b>G0</b> | Placebo      | 17.3<br>(16.0 - 21.3)              | 3.99<br>(3.18 - 4.70) <b>9,10×10<sup>-9</sup></b>                                             | 1.118<br>(0.541 - 1.992) <b>5,86×10<sup>-2</sup></b>    |
|           | Estradiol    | 21.5<br>(17.8 - 24.1)              | -0.156<br>(-1.171 - 1.351)                                                                    | 0.321<br>(-0.341 - 1.132)                               |
| <b>G1</b> | Placebo      | 34.1<br>(33.0 - 35.7)              | 1.98<br>(1.21 - 3.35) <b>4,38×10<sup>-7</sup></b>                                             | 0.510<br>(0.032 - 1.044) <b>1,53×10<sup>-1</sup></b>    |
|           | Estradiol    | 35.5<br>(34.8 - 36.4)              | 0.070<br>(-0.678 - 0.633)                                                                     | 0.004<br>(-0.424 - 0.522)                               |
| <b>G2</b> | Placebo      | 23.9<br>(19.8 - 25.6)              | -3.37<br>(-4.51 - -2.52) <b>1,14×10<sup>-7</sup></b>                                          | -0.744<br>(-1.610 - -0.299) <b>3,23×10<sup>-1</sup></b> |
|           | Estradiol    | 19.0<br>(17.2 - 22.3)              | 0.282<br>(-1.181 - 0.743)                                                                     | -0.321<br>(-1.032 - 0.215)                              |
| <b>S0</b> | Placebo      | 76.3<br>(73.8 - 78.0)              | 2.62<br>(1.96 - 3.30) <b>2,69×10<sup>-9</sup></b>                                             | 0.787<br>(0.211 - 1.512) <b>6,40×10<sup>-2</sup></b>    |
|           | Estradiol    | 77.9<br>(75.9 - 78.8)              | 0.008<br>(-1.022 - 0.759)                                                                     | 0.323<br>(-0.325 - 0.745)                               |
| <b>S1</b> | Placebo      | 18.3<br>(16.6 - 20.0)              | -2.53<br>(-3.28 - -2.01) <b>7,96×10<sup>-9</sup></b>                                          | -0.654<br>(-1.491 - -0.273) <b>1,58×10<sup>-1</sup></b> |
|           | Estradiol    | 16.9<br>(16.2 - 18.7)              | 0.157<br>(-0.650 - 0.910)                                                                     | -0.330<br>(-0.576 - 0.400)                              |
| <b>S2</b> | Placebo      | 4.84<br>(4.34 - 5.17)              | -0.127<br>(-0.328 - -0.043) <b>9,43×10<sup>-2</sup></b>                                       | -0.073<br>(-0.336 - 0.029) <b>1,58×10<sup>-1</sup></b>  |
|           | Estradiol    | 4.57<br>(4.20 - 5.22)              | -0.034<br>(-0.085 - 0.030)                                                                    | -0.023<br>(-0.204 - 0.077)                              |
| <b>G</b>  | Placebo      | 57.0<br>(55.3 - 59.1)              | -1.062<br>(-1.777 - -0.825) <b>6,64×10<sup>-3</sup></b>                                       | -0.331<br>(-0.981 - 0.389) <b>5,08×10<sup>-1</sup></b>  |
|           | Estradiol    | 54.8<br>(53.1 - 58.5)              | -0.221<br>(-0.600 - 0.315)                                                                    | -0.391<br>(-0.526 - 0.228)                              |

|            |           |                       |                            |                             |                             |                             |
|------------|-----------|-----------------------|----------------------------|-----------------------------|-----------------------------|-----------------------------|
| <b>S</b>   | Placebo   | 23.1<br>(21.3 - 25.3) | -2.56<br>(-3.34 - -2.22)   | <b>4,00×10<sup>-9</sup></b> | -0.800<br>(-1.525 - -0.153) | <b>3,64×10<sup>-2</sup></b> |
|            | Estradiol | 21.7<br>(20.4 - 23.5) | -0.020<br>(-0.719 - 0.937) |                             | -0.353<br>(-0.786 - 0.609)  |                             |
| <b>S/G</b> | Placebo   | 40.4<br>(37.5 - 44.0) | -3.79<br>(-5.50 - -2.78)   | <b>1,88×10<sup>-6</sup></b> | -1.169<br>(-2.206 - -0.095) | <b>1,53×10<sup>-1</sup></b> |
|            | Estradiol | 37.8<br>(36.4 - 44.1) | 0.125<br>(-0.987 - 1.377)  |                             | -0.179<br>(-1.353 - 1.054)  |                             |

p values describe statistical significance of difference between estradiol and placebo group after intervention ( $p_i$ ) and recovery ( $p_R$ ). p values smaller than 0.05 are bolded. IQR – limits of the interquartile range (1<sup>st</sup> quartile – 3<sup>rd</sup> quartile). B – bisecting N-acetylglucosamine; CF – core fucosylation, HM – high mannose; G0 – agalactosylated; G1 – monogalactosylated; G2 – digalactosylated; S0 – asialylated; S1 – monosialylated, S2 - disialylated structures. G = G1 + G2, S = S1 + S2, S/G = S / G.

**Supplementary Table 2.** Concentration of hormones at the baseline and differences from the baseline after intervention and after recovery timepoint.

| VARIABLE                            | INTERVENTION | DIFFERENCE IN CONCENTRATION RELATIVE TO BASELINE. |                              |                      |                            |                      |
|-------------------------------------|--------------|---------------------------------------------------|------------------------------|----------------------|----------------------------|----------------------|
|                                     |              | CONCENTRATION AT BASELINE<br>median (IQR)         | Intervention<br>median (IQR) | <b>p<sub>i</sub></b> | Recovery<br>median (IQR)   | <b>p<sub>R</sub></b> |
| <b>estradiol</b><br><i>pg/mL</i>    | Placebo      | 54.0<br>(44.5 - 79.2)                             | -31.5<br>(-53.5 - -19.8)     | <b>0,001</b>         | -7.5<br>(-45.2 - 25.5)     | 0,989                |
|                                     | Estradiol    | 57<br>(46 - 78)                                   | -15.0<br>(-35.0 - 29.5)      |                      | -1<br>(-32 - 30)           |                      |
| <b>estrone</b><br><i>pg/mL</i>      | Placebo      | 52<br>(37 - 67)                                   | -19<br>(-32 - -11)           | <b>0,001</b>         | -1<br>(-16 - 13)           | 0,989                |
|                                     | Estradiol    | 55.0<br>(39.0 - 68.0)                             | 3.0<br>(-10.5 - 20.0)        |                      | 0.0<br>(-10.5 - 23.0)      |                      |
| <b>FSH</b><br><i>mIU/mL</i>         | Placebo      | 5.95<br>(4.40 - 8.02)                             | -1.10<br>(-3.35 - -0.05)     | <b>0,001</b>         | 0.00<br>(-1.15 - 1.40)     | 0,471                |
|                                     | Estradiol    | 6.60<br>(4.95 - 9.15)                             | -5.10<br>(-7.25 - -3.05)     |                      | -1.85<br>(-3.03 - 0.45)    |                      |
| <b>LH</b><br><i>mIU/mL</i>          | Placebo      | 4.60<br>(3.55 - 5.10)                             | -4.00<br>(-4.88 - -2.88)     | 0,768                | -0.700<br>(-1.450 - 0.725) | 0,815                |
|                                     | Estradiol    | 4.90<br>(3.00 - 6.55)                             | -4.70<br>(-6.05 - -2.70)     |                      | -0.70<br>(-3.35 - 0.35)    |                      |
| <b>progesterone</b><br><i>ng/mL</i> | Placebo      | 0.4<br>(0.3 - 0.7)                                | -0.1<br>(-0.4 - 0.0)         | 0,989                | 0.0<br>(-0.2 - 0.2)        | 0,760                |
|                                     | Estradiol    | 0.4<br>(0.3 - 0.6)                                | -0.1<br>(-0.2 - 0.0)         |                      | 0.1<br>(-0.2 - 0.6)        |                      |
| <b>SHBG</b><br><i>nmol/L</i>        | Placebo      | 52<br>(30 - 63)                                   | -8<br>(-16 - -2)             | 0,094                | 2<br>(-6 - 5)              | 0,760                |
|                                     | Estradiol    | 35.0<br>(29.5 - 54.0)                             | -2.0<br>(-6.5 - 8.5)         |                      | -1.0<br>(-5.0 - 1.5)       |                      |
| <b>testosterone</b><br><i>ng/dL</i> | Placebo      | 28.0<br>(17.0 - 32.2)                             | -4.0<br>(-10.8 - 0.0)        | 0,760                | 0.0<br>(-2.0 - 6.9)        | 0,760                |
|                                     | Estradiol    | 29.0<br>(23.5 - 35.5)                             | -4.0<br>(-8.5 - 1.0)         |                      | 0.0<br>(-3.0 - 7.0)        |                      |

p values describe statistical significance of difference between estradiol and placebo group after intervention (p<sub>i</sub>) and recovery (p<sub>R</sub>). p values smaller than 0.05 in bold.

IQR – limits of the interquartile range (1<sup>st</sup> quartile - 3<sup>rd</sup> quartile).

FSH - Follicle-stimulating hormone; LH - Luteinizing hormone; SHBG - sex hormone-binding globulin

**Supplementary Table 3.** Relationship between a change in estradiol concentration and change in glycan abundance.

| Glycan     | Beta ± SE             | p value      |
|------------|-----------------------|--------------|
| GP1        | -0,079 ± 0,122        | 0,565        |
| GP2        | <b>-0,281 ± 0,088</b> | <b>0,008</b> |
| GP3        | -0,256 ± 0,122        | 0,073        |
| GP4        | <b>-0,220 ± 0,080</b> | <b>0,021</b> |
| GP5        | -0,208 ± 0,121        | 0,136        |
| GP6        | -0,019 ± 0,084        | 0,858        |
| GP7        | -0,228 ± 0,112        | 0,082        |
| GP8        | <b>-0,217 ± 0,090</b> | <b>0,039</b> |
| GP9        | <b>-0,299 ± 0,084</b> | <b>0,007</b> |
| GP10       | -0,094 ± 0,120        | 0,489        |
| GP11       | -0,190 ± 0,108        | 0,136        |
| GP12       | <b>0,282 ± 0,082</b>  | <b>0,007</b> |
| GP13       | <b>0,360 ± 0,115</b>  | <b>0,009</b> |
| GP14       | 0,124 ± 0,081         | 0,169        |
| GP15       | <b>0,209 ± 0,085</b>  | <b>0,037</b> |
| GP16       | -0,027 ± 0,130        | 0,858        |
| GP17       | <b>0,400 ± 0,096</b>  | <b>0,003</b> |
| GP18       | <b>0,222 ± 0,078</b>  | <b>0,017</b> |
| GP19       | -0,208 ± 0,127        | 0,147        |
| GP20       | <b>0,430 ± 0,115</b>  | <b>0,007</b> |
| GP21       | 0,138 ± 0,117         | 0,313        |
| GP22       | 0,121 ± 0,132         | 0,437        |
| GP23       | 0,180 ± 0,109         | 0,147        |
| GP24       | -0,124 ± 0,130        | 0,428        |
| <b>B</b>   | -0,014 ± 0,107        | 0,893        |
| <b>CF</b>  | <b>-0,295 ± 0,118</b> | <b>0,036</b> |
| <b>HM</b>  | -0,208 ± 0,121        | 0,136        |
| <b>G0</b>  | <b>-0,195 ± 0,078</b> | <b>0,036</b> |
| <b>G1</b>  | <b>-0,253 ± 0,083</b> | <b>0,011</b> |
| <b>G2</b>  | 0,133 ± 0,077         | 0,136        |
| <b>G</b>   | 0,086 ± 0,099         | 0,452        |
| <b>S0</b>  | <b>-0,271 ± 0,081</b> | <b>0,007</b> |
| <b>S1</b>  | <b>0,249 ± 0,077</b>  | <b>0,008</b> |
| <b>S2</b>  | 0,255 ± 0,116         | 0,064        |
| <b>S</b>   | <b>0,270 ± 0,081</b>  | <b>0,007</b> |
| <b>S/G</b> | <b>0,313 ± 0,090</b>  | <b>0,007</b> |

Beta = standardized coefficient; SE = standard error; GP = glycan peak in UPLC chromatogram; B = glycans with bisecting GlcNAc; CF = glycans with core fucosylation; HM = highly mannosylated glycans; G0 = agalactosylated glycans; G1 = monogalactosylated glycans; G2 = digalactosylated glycans; G = galactosylated glycans; S1 = monosialylated glycans; S2 = disialylated glycans; S = sialylated glycans; S/G = ratio of sialylation and galactosylation; B = glycans with bisecting GlcNAc

**Supplementary Table 4.** Changes in gene expression after transcriptional activation using dCas9-VPR or silencing, using dCas9-KRAB, of targeted loci. Reproducible significant results are shaded. Given p-values (p-val) are for Mann-Whitney test. Statistical significance: \* p<0.05; \*\* p<0.01; \*\*\* p<0.001; ns = not significant.

| Targeted locus | Probed locus | 1st replicate      |             |            | 2nd replicate      |             |            | pooled observations |             |             |
|----------------|--------------|--------------------|-------------|------------|--------------------|-------------|------------|---------------------|-------------|-------------|
|                |              | $\Delta\Delta C_t$ | fold change | p-val      | $\Delta\Delta C_t$ | fold change | p-val      | $\Delta\Delta C_t$  | fold change | p-val       |
| RUNX1 / VPR    | RUNX1        | -1.61              | 3.054       | 0.002 (*)  | -1.66              | 3.166       | 0.002 (*)  | -1.64               | 3.110       | 0.000 (***) |
| RUNX1 / KRAB   | RUNX1        | 0.18               | 0.883       | 0.589 (ns) | 0.21               | 0.866       | 0.393 (ns) | 0.19                | 0.875       | 0.378 (ns)  |
| RUNX3 / VPR    | RUNX3        | -2.53              | 5.781       | 0.002 (*)  | -2.46              | 5.510       | 0.002 (*)  | -2.50               | 5.644       | 0.000 (***) |
| RUNX3 / KRAB   | RUNX3        | 1.12               | 0.460       | 0.002 (*)  | 0.64               | 0.642       | 0.002 (*)  | 0.88                | 0.544       | 0.000 (***) |
| SPINK4 / VPR   | SPINK4       | -4.76              | 27.093      | 0.002 (*)  | -4.34              | 20.221      | 0.002 (*)  | -4.55               | 23.406      | 0.000 (***) |
| ELL2 / KRAB    | ELL2         | 0.00               | 0.998       | 1.000 (ns) | 0.65               | 0.636       | 0.002 (*)  | 0.33                | 0.796       | 0.319 (ns)  |
| RUNX3 / VPR    | B4GALT1      | -0.04              | 1.025       | 0.818 (ns) | /                  | /           | /          | -0.04               | 1.025       | 0.818 (ns)  |
| SPINK4 / VPR   | B4GALT1      | 0.31               | 0.804       | 0.008 (**) | 0.18               | 0.880       | 0.180 (ns) | 0.25                | 0.841       | 0.160 (ns)  |
| SPINK4 / VPR   | ST6GAL1      | -0.09              | 1.065       | 0.589 (ns) | /                  | /           | /          | -0.09               | 1.065       | 0.589 (ns)  |



**Supplementary Table 5.** Raw experimental data for glycan traits in gene activation and repression by dCas9-VPR and -KRAB fusions targeted using specific gRNA to individual loci. Glycan traits represent sums of absolute percentages of relevant glycan peaks. These data were used to construct Figure 3. Results for loci that did not result in a significant change in glycans (not shown in Figure 3) are also given. Comparison was made between “gRNA” and “NT” (non-targeting, negative control) sample sets. Glycan traits - **G0** (% of agalactosylated glycans) is: GP1, GP2, GP3, GP4, GP6; **G** (% of galactosylated glycans) is: GP7, GP8, GP9, GP10, GP11, GP12, GP13, GP14, GP15; **G1** (% of monogalactosylated glycans) is: GP7, GP8, GP9, GP10, GP11; **G2** (% of digalactosylated glycans) is: GP12, GP13, GP14, GP15. Note that **G = G1 + G2**.

| Locus          | Trait | Values / %                               | dCas9 fusion | Experiment |
|----------------|-------|------------------------------------------|--------------|------------|
| <i>B4GALT1</i> | G0    | 77.59, 81.17, 80.40, 81.61, 75.62, 78.60 | KRAB         | 1/1        |
|                | G     | 15.15, 12.12, 11.91, 11.80, 13.53, 12.48 |              |            |
|                | G1    | 11.92, 10.10, 9.72, 10.46, 10.45, 10.69  |              |            |
|                | G2    | 3.24, 2.02, 2.19, 1.34, 3.07, 1.80       |              |            |
|                | G0    | 60.75, 55.43, 61.31, 39.28, 61.01, 65.56 | NT           |            |
|                | G     | 28.13, 26.55, 25.15, 33.28, 25.32, 28.27 |              |            |
|                | G1    | 21.20, 19.78, 20.19, 22.03, 19.54, 23.48 |              |            |
|                | G2    | 6.93, 6.77, 4.95, 11.25, 5.78, 4.79      |              |            |
| <i>RUNX3</i>   | G0    | 68.70, 67.57, 68.22, 66.13, 63.18, 66.59 | VPR          | 1/2        |
|                | G     | 24.39, 25.70, 25.27, 25.40, 27.17, 26.13 |              |            |
|                | G1    | 21.44, 21.88, 21.46, 21.66, 22.85, 21.78 |              |            |
|                | G2    | 2.95, 3.82, 3.81, 3.74, 4.32, 4.35       |              |            |
|                | G0    | 62.33, 62.21, 63.46, 55.32, 53.90        | NT           |            |
|                | G     | 29.79, 31.66, 30.84, 34.42, 37.49        |              |            |
|                | G1    | 25.39, 26.62, 26.25, 27.12, 30.16        |              |            |
|                | G2    | 4.41, 5.04, 4.59, 7.30, 7.33             |              |            |
|                | G0    | 69.75, 68.47, 70.26, 71.71, 66.51, 72.56 | VPR          | 2/2        |
|                | G     | 23.90, 24.25, 21.79, 22.02, 20.65, 21.82 |              |            |
|                | G1    | 20.47, 20.60, 18.87, 19.33, 16.87, 18.21 |              |            |
|                | G2    | 3.44, 3.65, 2.92, 2.68, 3.78, 3.61       |              |            |
|                | G0    | 64.98, 66.70, 60.59, 67.82, 69.11, 68.36 | NT           |            |
|                | G     | 27.65, 25.42, 29.27, 26.40, 25.84, 27.79 |              |            |
|                | G1    | 23.52, 22.20, 23.55, 22.89, 22.57, 24.05 |              |            |
|                | G2    | 4.13, 3.22, 5.72, 3.50, 3.27, 3.74       |              |            |
| <i>SPINK4</i>  | G0    | 57.03, 55.18, 66.55, 56.21, 54.76, 59.19 | VPR          | 1/2        |
|                | G     | 29.21, 25.22, 26.24, 30.50, 27.84, 25.18 |              |            |
|                | G1    | 21.98, 20.06, 22.18, 22.82, 21.21, 20.16 |              |            |
|                | G2    | 7.22, 5.16, 4.06, 7.69, 6.63, 5.02       |              |            |
|                | G0    | 62.33, 62.21, 63.46, 55.32, 53.90        | NT           |            |
|                | G     | 29.79, 31.66, 30.84, 34.42, 37.49        |              |            |
|                | G1    | 25.39, 26.62, 26.25, 27.12, 30.16        |              |            |
|                | G2    | 4.41, 5.04, 4.59, 7.30, 7.33             |              |            |

|              |                                          |                                          |              |            |
|--------------|------------------------------------------|------------------------------------------|--------------|------------|
|              | G0                                       | 71.83, 69.31, 66.49, 68.93, 72.57, 66.59 | VPR          | 2/2        |
|              | G                                        | 22.58, 25.59, 24.66, 19.52, 21.71, 26.70 |              |            |
|              | G1                                       | 19.61, 22.18, 18.92, 16.75, 18.83, 22.26 |              |            |
|              | G2                                       | 2.97, 3.40, 5.75, 2.77, 2.88, 4.44       |              |            |
|              | G0                                       | 64.98, 66.70, 60.59, 67.82, 69.11, 68.36 | NT           |            |
|              | G                                        | 27.65, 25.42, 29.27, 26.40, 25.84, 27.79 |              |            |
|              | G1                                       | 23.52, 22.20, 23.55, 22.89, 22.57, 24.05 |              |            |
|              | G2                                       | 4.13, 3.22, 5.72, 3.50, 3.27, 3.74       |              |            |
| Locus        | Trait                                    | Values / %                               | dCas9 fusion | Experiment |
| <i>RUNX1</i> | G0                                       | 60.89, 59.07, 64.33, 56.27, 52.58, 58.52 | VPR          | 1/1        |
|              | G                                        | 30.30, 34.70, 28.00, 35.02, 37.63, 32.57 |              |            |
|              | G1                                       | 24.30, 28.29, 23.69, 29.70, 29.84, 25.99 |              |            |
|              | G2                                       | 6.00, 6.41, 4.31, 5.32, 7.79, 6.58       |              |            |
|              | G0                                       | 62.33, 62.21, 63.46, 55.32, 53.90        | NT           |            |
|              | G                                        | 29.79, 31.66, 30.84, 34.42, 37.49        |              |            |
|              | G1                                       | 25.39, 26.62, 26.25, 27.12, 30.16        |              |            |
|              | G2                                       | 4.41, 5.04, 4.59, 7.30, 7.33             |              |            |
|              | G0                                       | 68.61, 66.89, 61.98, 66.16, 67.10, 67.27 | VPR          | 2/2        |
|              | G                                        | 24.43, 26.70, 25.95, 28.35, 26.41, 23.26 |              |            |
|              | G1                                       | 21.19, 23.00, 21.65, 24.16, 22.27, 19.83 |              |            |
|              | G2                                       | 3.23, 3.71, 4.30, 4.19, 4.14, 3.43       |              |            |
|              | G0                                       | 64.98, 66.70, 60.59, 67.82, 69.11, 68.36 | NT           |            |
|              | G                                        | 27.65, 25.42, 29.27, 26.40, 25.84, 27.79 |              |            |
|              | G1                                       | 23.52, 22.20, 23.55, 22.89, 22.57, 24.05 |              |            |
|              | G2                                       | 4.13, 3.22, 5.72, 3.50, 3.27, 3.74       |              |            |
|              | G0                                       | 44.83, 54.34, 52.65, 53.24, 49.80, 43.74 | KRAB         | 1/1        |
|              | G                                        | 36.33, 31.23, 29.88, 35.00, 32.47, 32.39 |              |            |
|              | G1                                       | 25.91, 25.13, 24.17, 29.13, 25.53, 22.28 |              |            |
|              | G2                                       | 10.41, 6.11, 5.71, 5.87, 6.93, 10.11     |              |            |
| G0           | 60.75, 55.43, 61.31, 39.28, 61.01, 65.56 | NT                                       |              |            |
| G            | 28.13, 26.55, 25.15, 33.28, 25.32, 28.27 |                                          |              |            |
| G1           | 21.20, 19.78, 20.19, 22.03, 19.54, 23.48 |                                          |              |            |
| G2           | 6.93, 6.77, 4.95, 11.25, 5.78, 4.79      |                                          |              |            |
| G0           | 77.22, 78.08, 75.64, 77.24, 69.33, 74.23 | KRAB                                     | 2/2          |            |
| G            | 17.47, 17.40, 16.44, 17.42, 25.18, 18.32 |                                          |              |            |
| G1           | 15.40, 15.23, 14.77, 15.46, 20.53, 15.09 |                                          |              |            |
| G2           | 2.07, 2.18, 1.67, 1.96, 4.65, 3.23       |                                          |              |            |
| G0           | 75.84, 76.98, 78.08, 72.77, 66.06, 74.83 | NT                                       |              |            |
| G            | 17.72, 18.51, 18.20, 21.38, 19.50, 20.05 |                                          |              |            |
| G1           | 15.15, 16.22, 16.22, 17.66, 15.92, 17.43 |                                          |              |            |
| G2           | 2.57, 2.28, 1.98, 3.72, 3.58, 2.62       |                                          |              |            |
| <i>RUNX3</i> | G0                                       | 50.38, 51.25, 50.47, 54.80, 59.60, 48.60 | KRAB         | 1/2        |
|              | G                                        | 35.13, 32.66, 32.38, 34.67, 34.88, 33.54 |              |            |
|              | G1                                       | 27.88, 25.10, 24.96, 28.04, 29.14, 26.58 |              |            |
|              | G2                                       | 7.24, 7.57, 7.41, 6.63, 5.74, 6.96       |              |            |

|      |    |                                          |      |     |
|------|----|------------------------------------------|------|-----|
|      | G0 | 60.75, 55.43, 61.31, 39.28, 61.01, 65.56 | NT   | 2/2 |
|      | G  | 28.13, 26.55, 25.15, 33.28, 25.32, 28.27 |      |     |
|      | G1 | 21.20, 19.78, 20.19, 22.03, 19.54, 23.48 |      |     |
|      | G2 | 6.93, 6.77, 4.95, 11.25, 5.78, 4.79      |      |     |
|      | G0 | 77.46, 77.67, 73.85, 71.52, 77.34, 71.15 | KRAB |     |
|      | G  | 17.94, 17.85, 19.23, 17.24, 18.60, 20.85 |      |     |
|      | G1 | 15.61, 15.76, 16.09, 14.44, 16.48, 18.32 |      |     |
|      | G2 | 2.33, 2.08, 3.14, 2.79, 2.13, 2.53       |      |     |
|      | G0 | 75.84, 76.98, 78.08, 72.77, 66.06, 74.83 | NT   |     |
|      | G  | 17.72, 18.51, 18.20, 21.38, 19.50, 20.05 |      |     |
|      | G1 | 15.15, 16.22, 16.22, 17.66, 15.92, 17.43 |      |     |
|      | G2 | 2.57, 2.28, 1.98, 3.72, 3.58, 2.62       |      |     |
| ELL2 | G0 | 54.80, 44.56, 46.96, 47.55, 42.07, 41.05 | KRAB | 1/2 |
|      | G  | 33.26, 30.64, 29.09, 34.12, 38.70, 41.56 |      |     |
|      | G1 | 27.24, 20.08, 18.28, 26.50, 27.69, 26.79 |      |     |
|      | G2 | 6.02, 10.56, 10.81, 7.62, 11.01, 14.77   |      |     |
|      | G0 | 60.75, 55.43, 61.31, 39.28, 61.01, 65.56 | NT   |     |
|      | G  | 28.13, 26.55, 25.15, 33.28, 25.32, 28.27 |      |     |
|      | G1 | 21.20, 19.78, 20.19, 22.03, 19.54, 23.48 |      |     |
|      | G2 | 6.93, 6.77, 4.95, 11.25, 5.78, 4.79      |      |     |
|      | G0 | 71.54, 78.77, 75.81, 71.19, 75.26, 73.37 | KRAB | 2/2 |
|      | G  | 17.61, 16.81, 19.39, 17.11, 16.98, 20.52 |      |     |
|      | G1 | 14.19, 15.13, 16.45, 14.04, 14.32, 16.20 |      |     |
|      | G2 | 3.42, 1.68, 2.94, 3.07, 2.66, 4.32       |      |     |
|      | G0 | 75.84, 76.98, 78.08, 72.77, 66.06, 74.83 | NT   |     |
|      | G  | 17.72, 18.51, 18.20, 21.38, 19.50, 20.05 |      |     |
|      | G1 | 15.15, 16.22, 16.22, 17.66, 15.92, 17.43 |      |     |
|      | G2 | 2.57, 2.28, 1.98, 3.72, 3.58, 2.62       |      |     |

**Supplementary Table 6. Sequences of gRNA molecules used in each experiment.**

| <b>sgRNA molecule</b> | <b>Target site sequence (5'→3')</b> | <b>Experiment</b>               |
|-----------------------|-------------------------------------|---------------------------------|
| RUNX1_A-sg01          | GCCTGCGTGTGGCTGCGGAA                | Overexpression with dSaCas9-VPR |
| RUNX1_A-sg02          | GCCCCTATGCAAACGAGCTGA               |                                 |
| RUNX1_A-sg03          | GAGTAGACTTTGCAAGAGGG                |                                 |
| RUNX3_A-sg01          | GTGGTGGGTACGAGGGCGGCC               |                                 |
| RUNX3_A-sg02          | GTGGCACTGGGGCCTCCTCCG               |                                 |
| RUNX3_A-sg03          | GGGCCTGCCGGAGGCCGCCCA               |                                 |
| SPINK4_A-sg01         | GCACCTAGAGCAAGCCCTTT                |                                 |
| SPINK4_A-sg02         | GGCCCTAGATAAGATAAGATT               |                                 |
| SPINK4_A-sg03         | GCCATGGGGCTGGCAGGTTTC               |                                 |
| B4GALT1_A-sg01        | GCGACTAGGGGAGGGCCCCGGA              |                                 |
| RUNX1_G-sg01          | GGGCTGCGTACAGTAGCGCG                |                                 |
| RUNX1_G-sg02          | GAGCCGAGTAGACTTTGCAAG               |                                 |
| RUNX1_G-sg03          | GGCAGCGTGGTGCCCTGGCT                |                                 |
| RUNX3_G-sg01          | GCACCTCGGTGGCGTTCGCG                |                                 |
| RUNX3_G-sg02          | GCGCGGGGTTAGTACCCCCG                |                                 |
| RUNX3_G-sg03          | GGACCGGAATCCAAATTCT                 |                                 |
| ELL2_G-sg01           | GTCCGGCTCTAGCCTCCACTG               |                                 |
| ELL2_G-sg02           | GCTATGGGCTGTCGTGCGGA                |                                 |
| ELL2_G-sg03           | GCCGCCATCTTAAACTCCCC                |                                 |
| B4GALT1_G-sg01        | GTAGGGACGCGCCTGGCATCG               |                                 |
| NT-sgRNA              | GTAGGCGCGCCGCTCTCTAC                | Non-targeting control           |

**Supplementary Table 7. Details of plasmid constructs used for modular Golden Gate cloning method (Josipović et al. 2019).**

| <b>Plasmid</b>                       | <b>Description</b>                             | <b>Resistance</b> | <b>Ends</b>     | <b>Restriction</b>     | <b>Selection</b>      |
|--------------------------------------|------------------------------------------------|-------------------|-----------------|------------------------|-----------------------|
| pSgM1-A                              | SaCas9 sgRNA scaffold, U6 promoter, position 1 | Spectinomycin     | B-A             | Esp3I; Bpil (sgRNA)    | red-white for gRNA    |
| pSgM2-A                              | SaCas9 sgRNA scaffold, U6 promoter, position 2 | Spectinomycin     | A-I             | Esp3I; Bpil (sgRNA)    | red-white for gRNA    |
| pSgM3-A                              | SaCas9 sgRNA scaffold, U6 promoter, position 3 | Spectinomycin     | I-II            | Esp3I; Bpil (sgRNA)    | red-white for gRNA    |
| pSgM1-G                              | SpCas9 sgRNA scaffold, U6 promoter, position 1 | Spectinomycin     | B-A             | Esp3I; Bpil (sgRNA)    | red-white for gRNA    |
| pSgM2-G                              | SpCas9 sgRNA scaffold, U6 promoter, position 2 | Spectinomycin     | A-I             | Esp3I; Bpil (sgRNA)    | red-white for gRNA    |
| pSgM3-G                              | SpCas9 sgRNA scaffold, U6 promoter, position 3 | Spectinomycin     | I-II            | Esp3I; Bpil (sgRNA)    | red-white for gRNA    |
| pSgx1                                | Single sgRNA module, accepts 1 sgRNA           | Kanamycin         | B-A; B-A (out)  | Bsal; Esp3I (inverted) | red-white for modules |
| pSgx3                                | Multiple sgRNA module, accepts 3 sgRNA         | Kanamycin         | B-A; B-II (out) | Bsal; Esp3I (inverted) | red-white for modules |
| pBackBone-BZ                         | Backbone for assembly                          | Ampicillin        | B-Z (out)       | Bsal (inverted)        | blue-white            |
| tNS-pPro-CBh                         | Cbh promoter                                   | Kanamycin         | A-I             | Bsal                   | none                  |
| pHC-1-f3 (module for heavy chain)    | Heavy chain of IgG                             | Kanamycin         | I-III           | Bsal                   | none                  |
| pLC-Int-T2A (module for light chain) | Light chain of IgG                             | Kanamycin         | III-IV          | Bsal                   | none                  |
| tNS-pTer-H                           | Bgh transcriptional terminator                 | Kanamycin         | IV-Z            | Bsal                   | none                  |

**Supplementary Table 8. Primer sequences.**

| Primer    | Sequence (5'→3')        | Use                                                        |
|-----------|-------------------------|------------------------------------------------------------|
| RUNX3 Fw  | CAGATCCTGGCCGTCTCATC    | Amplification of <i>RUNX3</i> transcript<br>with SYBR QPCR |
| RUNX3 Rev | GGCTTATCCTGTGGGCCAAT    |                                                            |
| HPRT1 Fw  | CCTGGCGTCGTGATTAGTGAT   | Amplification of <i>HPRT1</i> transcript<br>with SYBR QPCR |
| HPRT1 Rev | AGACGTTTCAGTCCTGTCCATAA |                                                            |
